# Supplementary material for: Functional characterization of B class MADS-box transcription factors in Gerbera hybrida
Source: PubMed Central journal article supplement — J Exp Bot. 2009 Sep 18;61(1):75–85. doi: 10.1093/jxb/erp279 (PMC2791112; doi:10.1093/jxb/erp279), 2009-09-18
Supplement: erp279_1.pdf [file erp279_1.pdf]

## Supplementary material

### Functional characterization of B class MADS-box transcription factors in *Gerbera hybrida*

Suvi K. Broholm, Eija Pöllänen<sup>1</sup>, Satu Ruokolainen, Sari Tähtiharju, Mika Kotilainen<sup>2</sup>, Victor A. Albert<sup>3</sup>, Paula Elomaa and Teemu H. Teeri\*

Department of Applied Biology, P.O. Box 27, University of Helsinki, Finland

Present addresses:

<sup>1</sup> Department of Health Sciences, P.O. Box 35, University of Jyväskylä, FIN-40014, Finland

<sup>2</sup> Department of Biological and Environmental Sciences, P.O. Box 56, University of Helsinki, Finland

<sup>3</sup> Department of Biological Sciences, University at Buffalo (SUNY), Buffalo, NY 14260

**Running title:** B class MADS-box transcription factors in *Gerbera*



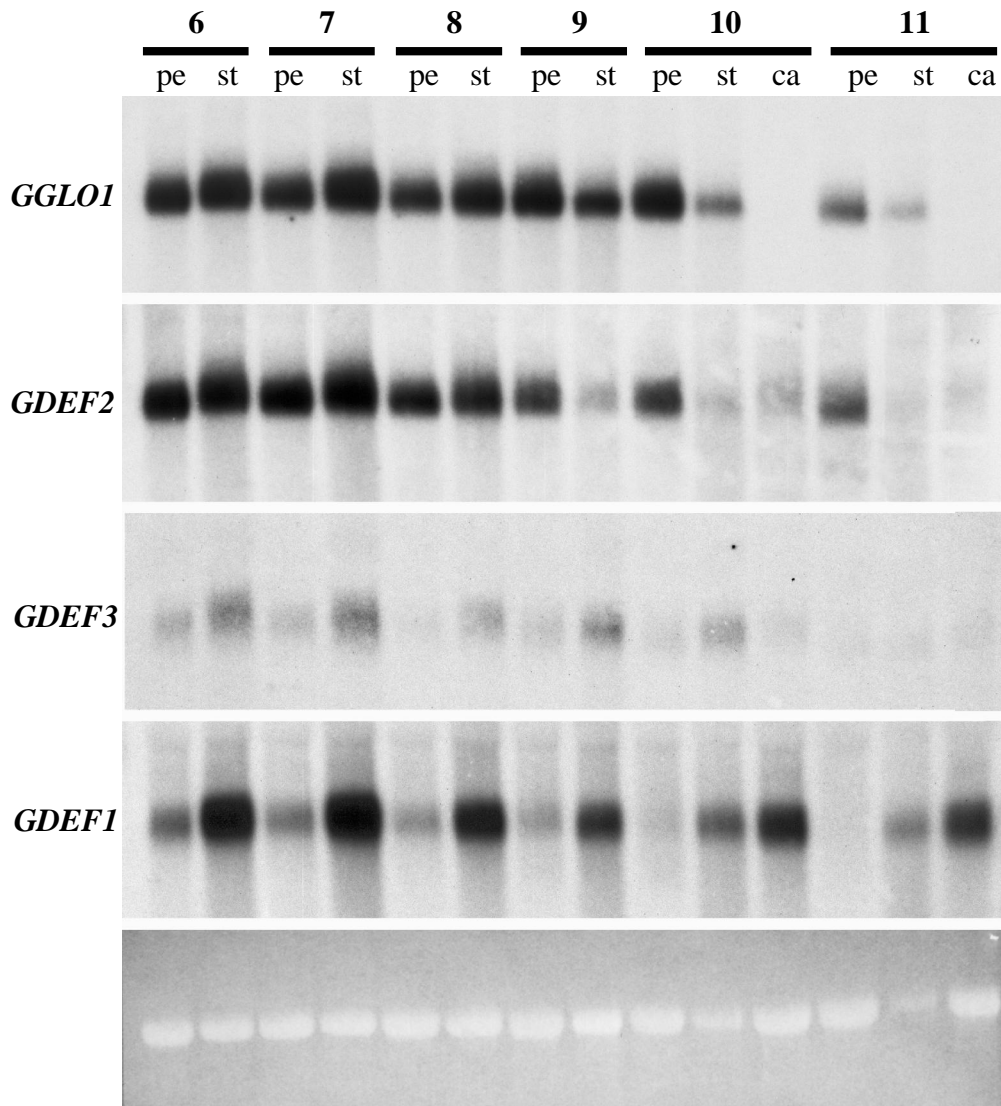

**Figure S2**

The expression of gerbera B class genes in disc flower petals and stamens (stages 6-11) and carpels (stages 10-11). *GGLO1* and *GDEF2* show strong and consistent expression in disc flower petals and stamens, whereas the expression of both *GDEF3* and *GDEF1* in petals diminishes earlier. At the late stage 11, *GGLO1* and *GDEF1* are the only genes detected in stamens. *GDEF1* is also the only gene showing strong expression in carpels at the stages studied (10 and 11). The lowest panel shows ethidium bromide-stained ribosomal RNA bands to control RNA loading.

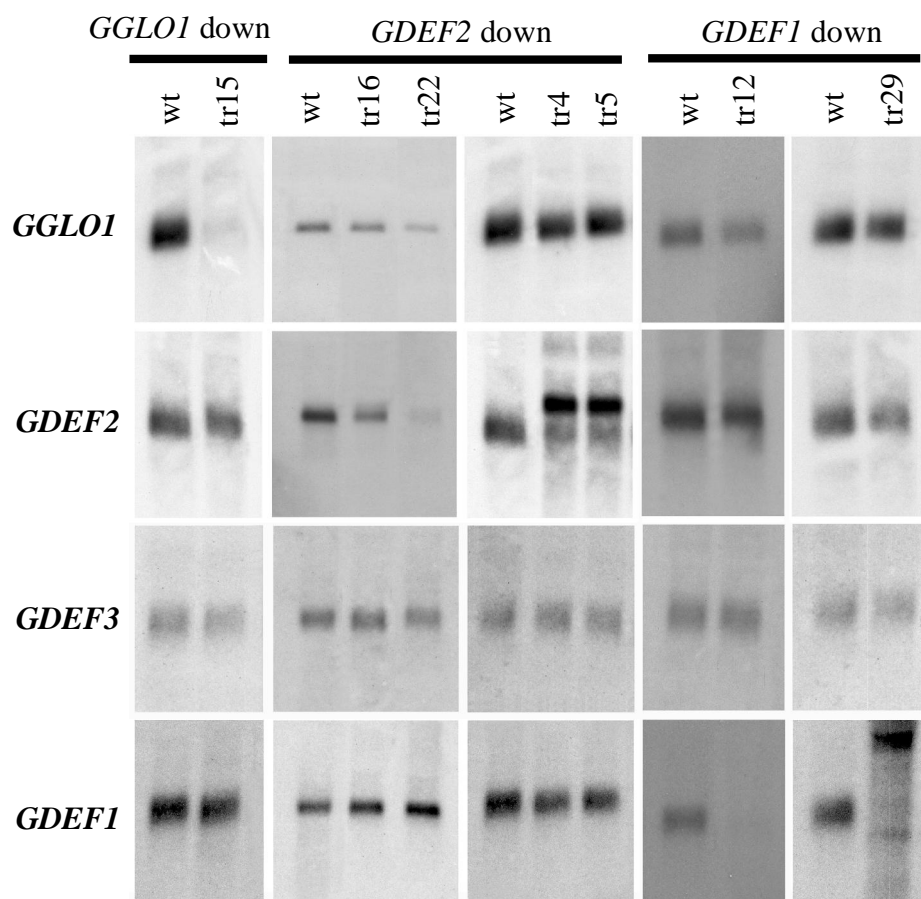

**Figure S3**

Expression of gerbera class B genes in young inflorescences of the transgenic lines described in this study. The *GGLO1* cosuppression line tr15 shows reduced *GGLO1* expression, whereas the level of *GDEF2*, *GDEF3* and *GDEF1* expression is similar to wild type (wt). For *GDEF2*, we obtained two cosuppression-lines (tr16 and tr22) and two antisense-lines (tr4 and tr5) with reduced *GDEF2* expression. In tr22, *GGLO1* expression is also reduced, but in the other lines the level of *GGLO1*, *GDEF3* and *GDEF1* expression is similar to wt. Two lines transformed with 35S::antisense-*GDEF1* construct show reduced *GDEF1* expression, whereas all the other gerbera B class genes are expressed like in wt.

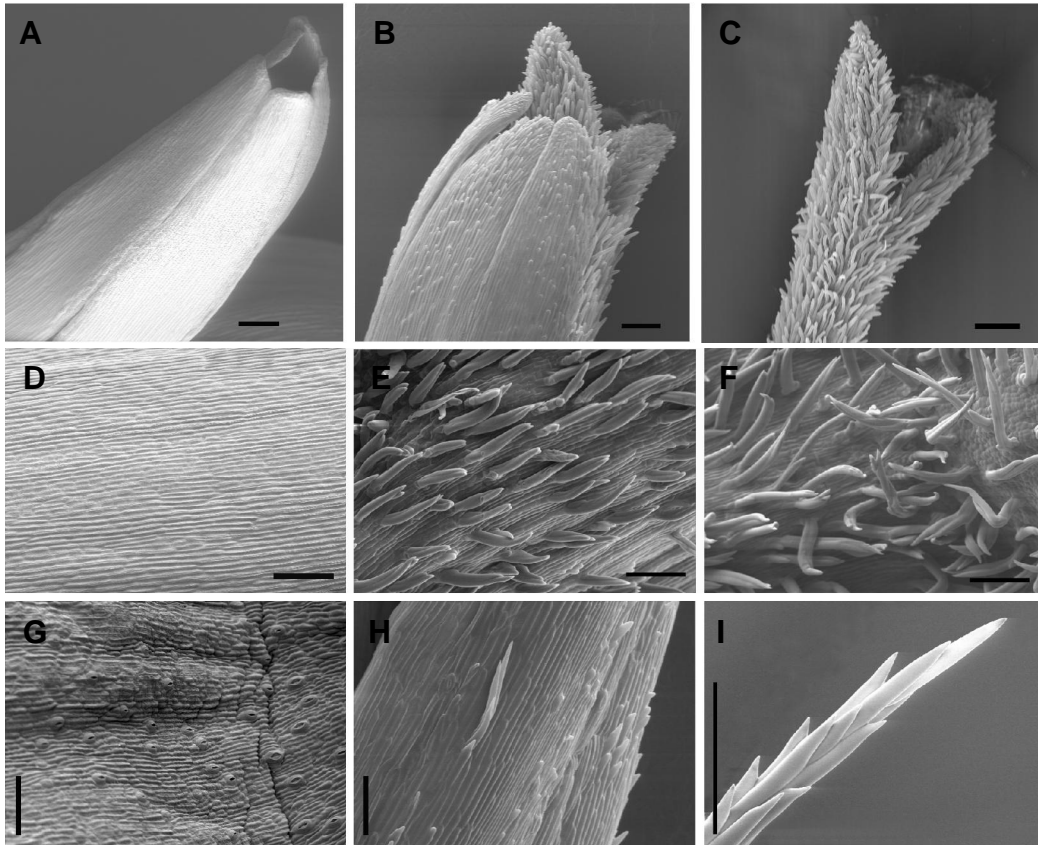

**Figure S4**

SEM analysis comparing the epidermal cell structure of gerbera floral organs between wild type (wt) and transgenic (tr) lines with cosuppressed *GDEF2* expression revealed similar homeotic changes in stamens and petals than in the transgenic line with reduced *GGLO1* expression. Wt stamen (A) and tr stamen (B), which resembles wt carpel (C). Wt petal tube (D) and tr petal tube (E) with trichomes similar to trichomes in the wt ovary wall (F). Wt petal ligule (G) and tr petal ligule (H) with trichomes that resemble wt whorl one pappus bristles (I). Scale bars 100 μm.

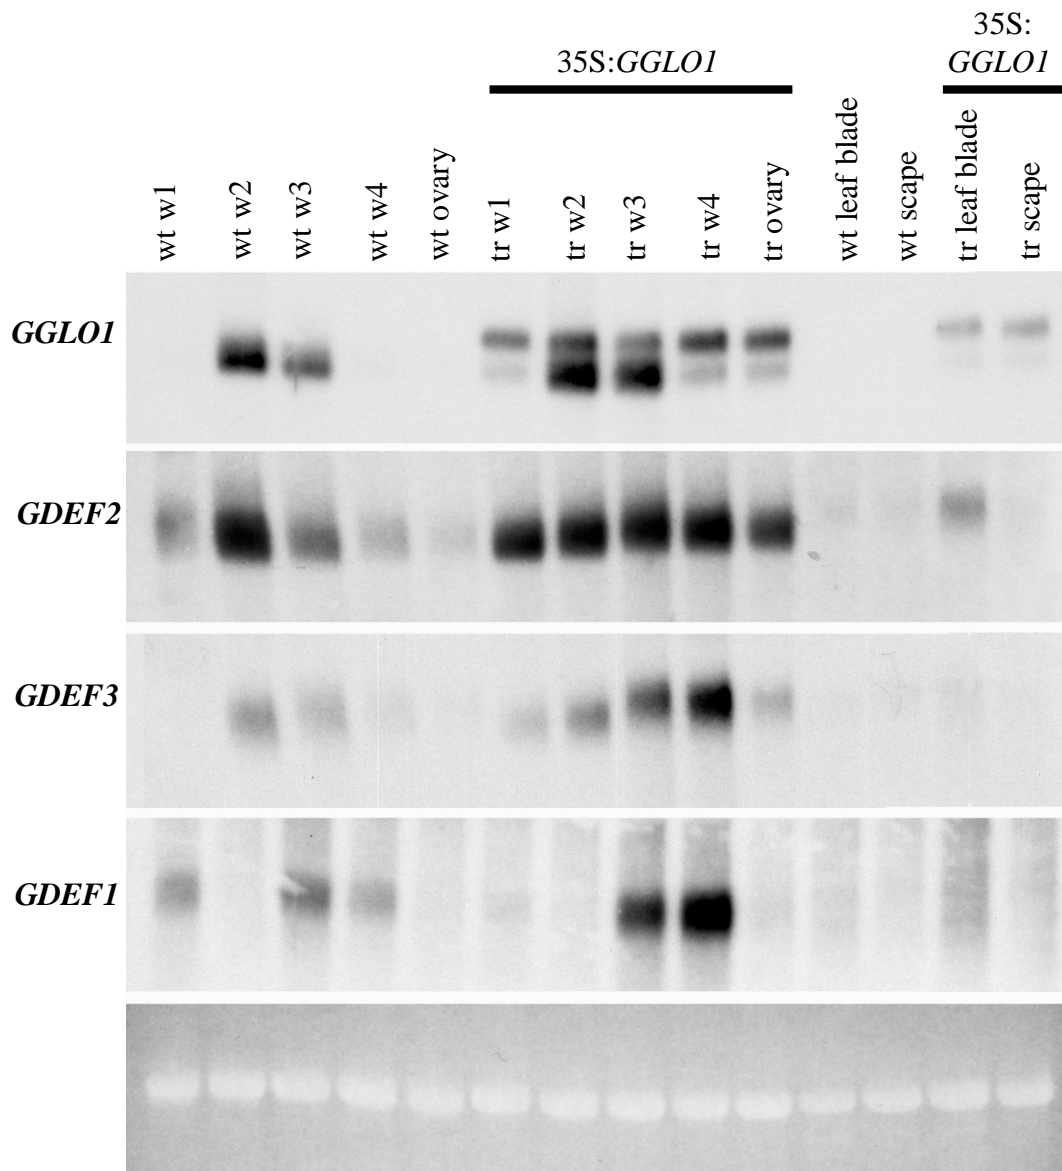

**Figure S5**

Expression of all the gerbera B class genes in 35S:*GGLO1* overexpression line that had petaloid organs in whorl 1 (w1) and stamenoid organs in whorl four (w4). The endogenous *GGLO1* transcripts (lower band) and the 35S promoter driven transcripts (upper band) can be distinguished. The expression of *GDEF2* is enhanced in all floral organs and in leaves. *GDEF3* expression is most strongly enhanced in w4. *GDEF1* expression is enhanced only in stamens (w3) and w4, whereas its expression is reduced in the petaloid w1 organs. The lowest panel shows ethidium bromide-stained ribosomal RNA bands to control RNA loading.

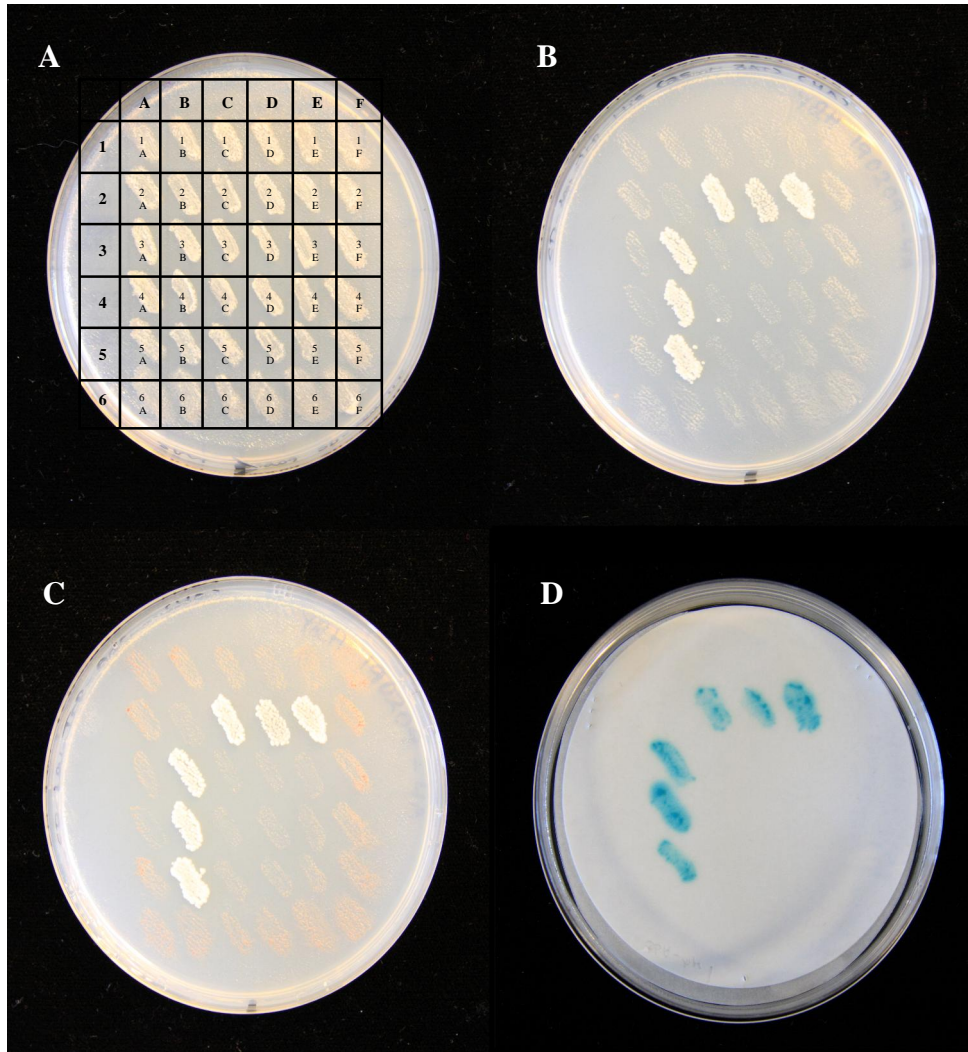

**Figure S6**

Yeast two-hybrid analysis of the gerbera B class MADS domain proteins. The constructs transformed in the yeast strains PJ694  $\alpha$  (1-6) and PJ694A (A-F) are shown in the table. Mating of these yeast strains resulted in growth on SD -Leu -Trp plates (A). Growth on selection plates SD -Leu -Trp -His +25 mM 3-AT (B) and SD -Leu -Trp -Ade (C) showed the interaction of GGLO1 protein with all the three DEF/AP3-like proteins GDEF1, GDEF2, and GDEF3. The same interactions were verified by the X-gal assay (D).

|   | A  | B  | C  | D  | E  | F  |
|---|----|----|----|----|----|----|
| 1 | 1A | 1B | 1C | 1D | 1E | 1F |
| 2 | 2A | 2B | 2C | 2D | 2E | 2F |
| 3 | 3A | 3B | 3C | 3D | 3E | 3F |
| 4 | 4A | 4B | 4C | 4D | 4E | 4F |
| 5 | 5A | 5B | 5C | 5D | 5E | 5F |
| 6 | 6A | 6B | 6C | 6D | 6E | 6F |

- |    |            |    |            |
|----|------------|----|------------|
| 1. | pBD32      | A. | pAD22      |
| 2. | pBD32GGLO1 | B. | pAD22GGLO1 |
| 3. | pBD32GDEF1 | C. | pAD22GDEF1 |
| 4. | pBD32GDEF2 | D. | pAD22GDEF2 |
| 5. | pBD32GDEF3 | E. | pAD22GDEF3 |
| 6. | pBD32GAGA1 | F. | pAD22GAGA1 |

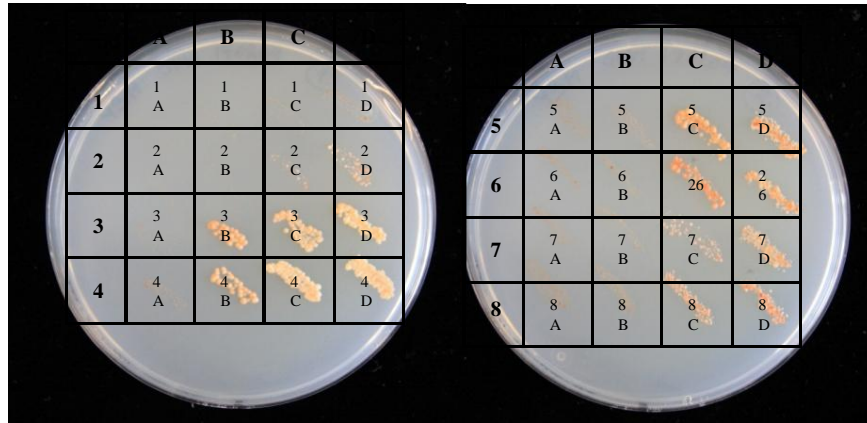

**Figure S7**

Yeast three hybrid (Y3H) analysis of the gerbera B class MADS domain proteins. The constructs transformed in the yeast strains PJ694A (combinations 1-8) and PJ694 $\alpha$  (A-D) are listed below. Growth on high stringency selection plates (SD -Leu -Trp -Ura -Ade) showed that GGLO1-GDEF2 and GGLO1-GDEF3 (and GGLO1-GDEF1) heterodimers were capable to form ternary complexes with the gerbera class C proteins (GAGA1-2). Both GGLO1-GDEF2 and GGLO1-GDEF3 also formed ternary complexes with the gerbera AP1/FUL-like proteins (GSQUA1, 2, 3, 5), whereas the GGLO1-GDEF1 heterodimer did not.

- |    |                      |    |                       |
|----|----------------------|----|-----------------------|
| 1. | pARC351 + pDEST22    | 5. | pY3HGGLO1 + pADGSQUA1 |
| 2. | pY3HGGLO1 + pDEST22  | 6. | pY3HGGLO1 + pADGSQUA2 |
| 3. | pY3HGGLO1 + pADGAGA1 | 7. | pY3HGGLO1 + pADGSQUA3 |
| 4. | pY3HGGLO1 + pADGAGA2 | 8. | pY3HGGLO1 + pADGSQUA5 |
| A. | pDEST32              |    |                       |
| B. | pBDGDEF1             |    |                       |
| C. | pBDGDEF2             |    |                       |
| D. | pBDGDEF3             |    |                       |

**The Y3H method:**

The plasmid pARC351 (Gateway compatible pRED-NLSa plasmid derivative, P. Ouwerkerk; Gateway modifications by R. Immink) was used to express GGLO1 in yeast cells. The expression clones were made by recombining the previously made entry clones (as described in materials and methods) with the destination vectors according to Invitrogen's instructions. The pARC351, pDEST22 and their derivatives carrying *GGLO1* and the gerbera *AG*- and *SQUA*-like MADS box genes, respectively, were transformed into yeast strain PJ69-4A (combinations 1-8). Instead, the pDEST32 and its derivatives were transformed into yeast strain PJ69-4 $\alpha$  (constructs A-D). To obtain yeast triple transformants, the A and  $\alpha$  types of yeast strains were mated by pipetting them on top of each other on SD Complete plates containing all the essential amino acids. Yeast triple transformants were further plated on selection plates SD -Leu -Trp-Ura, and these colonies were replica plated on SD -Leu -Trp -Ura -Ade, essentially as described in ProQuest Two-Hybrid System Manual (Invitrogen PQ10001-01). The plates were incubated at +22 °C for 5 days.



**Table S1** The B class genes used in the phylogenetic analysis (Fig. 1)

| <b>Clade</b>    | <b>Species</b>                   | <b>Gene Name</b> | <b>GeneBank Accession No.</b> |     |          |
|-----------------|----------------------------------|------------------|-------------------------------|-----|----------|
| <b>Asterids</b> |                                  |                  |                               |     |          |
| Asteraceae      | <i>Gerbera hybrida</i>           | GDEF1            | AJ009724                      |     |          |
|                 |                                  | GDEF2            | AJ009725                      |     |          |
|                 |                                  | GDEF3            | FJ817421                      |     |          |
|                 |                                  | GGLO1            | AJ009726                      |     |          |
|                 | <i>Helianthus annuus</i>         | HAM2             | EF612597                      |     |          |
|                 |                                  | HAM31            | AY173069                      |     |          |
|                 |                                  | HAM63            | EF612598                      |     |          |
|                 |                                  | HAM91            | AY173070                      |     |          |
|                 | <i>Dendranthema grandiflorum</i> | HaPI             | AY157725                      |     |          |
|                 |                                  | CDM19            | AY173064                      |     |          |
| CDM86           |                                  | AY173061         |                               |     |          |
| Plantaginaceae  | <i>Hieracium piloselloides</i>   | CDM115           | AY173060                      |     |          |
|                 |                                  | HpDEF2           | AF180365                      |     |          |
|                 | <i>Antirrhinum majus</i>         | DEF              | X52023                        |     |          |
|                 |                                  | GLO              | X68831                        |     |          |
| Solanaceae      | <i>Petunia hybrida</i>           | PhDEF            | AY205603                      |     |          |
|                 |                                  | PhTM6            | AY532264                      |     |          |
|                 |                                  | PhGLO1           | AAS46018                      |     |          |
|                 |                                  | PhGLO2           | CAA49568                      |     |          |
|                 | <i>Solanum lycopersicum</i>      | TAP3             | DQ674532                      |     |          |
|                 |                                  | TM6              | X60759                        |     |          |
|                 |                                  | LePI             | SGN-U324841                   |     |          |
|                 |                                  | TPI              | DQ674531                      |     |          |
|                 |                                  | <b>Rosids</b>    |                               |     |          |
|                 |                                  | Brassicaceae     | <i>Arabidopsis thaliana</i>   | AP3 | AF115814 |
| PI              | AF115815                         |                  |                               |     |          |
| Rosaceae        | <i>Rosa rugosa</i>               | MASAKOeuB3       | AB099875                      |     |          |
|                 |                                  | MASAKOB3         | AB055966                      |     |          |
|                 |                                  | MASAKOBP         | AB038462                      |     |          |
|                 | <i>Malus domestica</i>           | MdTM6            | AB081093                      |     |          |
|                 |                                  | MdMADS13         | AJ251116                      |     |          |
| Vitaceae        | <i>Vitis vinifera</i>            | VvAP3            | EF418603                      |     |          |
|                 |                                  | VvTM6            | DQ979341                      |     |          |
|                 |                                  | VvPI             | DQ988043                      |     |          |

**Table S2** Primer sequences of gerbera B class MADS-box genes used for Gateway (Invitrogen) conversion. The Gateway derived part of primer was added to the 5' end of gene specific primer sequence.

| <b>Gene</b>             | <b>Forward primer 5'</b>      | <b>Reverse primer 3'</b>      |
|-------------------------|-------------------------------|-------------------------------|
| <i>GGLO1</i>            | TCATGGGGAGAGGAAAAGATA         | TTACATCCTCTCATGCAA            |
| <i>GDEF1</i>            | TCATGGGGAGGGGGAAGATA          | TCAATTAGTGTGTTGATGATCATGGAG   |
| <i>GDEF2</i>            | TCATGGCGAGAGGAAAAGATC         | CTAGCCAAGCAAAGCATA            |
| <i>GDEF3</i>            | CAATGGCGAGAGGGGAAGATC         | GTTAGCCAAGCAAAGCATAT          |
| <i>GAGAI</i>            | TCATGGAAAATTCTGATGTGCTTGAGC   | TTACTACTAACTGGAGCGG           |
| <b>Gateway sequence</b> | GGGGACAAGTTTGTACAAAAAAGCAGGCT | GGGGACCACTTTGTACAAGAAAGCTGGGT |
